# Supplementary material
Source: publisher figshare collection journal article supplement (https://gsajournals.figshare.com/ndownloader/files/16979171)
Supplement: Supplementary file 1 [file 16979171]

## Sheet: Sheet1
	Sucrose					MPH					Response to treatment
DGRP Line	Raw mean (cm)	Adjusted mean	SE	n		Raw mean (cm)	Adjusted mean	SE	n
DGRP_100	442.611	49.9755	27.0162	30		448.644	63.2773	26.4117	30		-13.3019
DGRP_101	445.763	53.7775	37.8539	30		429.122	28.4719	38.5626	29		25.3056
DGRP_105	384.913	64.3694	17.0577	30		380.015	27.8359	25.7913	29		36.5335
DGRP_109	194.36	-131.084	36.5397	21		259.366	-74.6868	41.4951	22		-56.3974
DGRP_129	337.389	-64.9551	24.676	30		341.487	-75.5462	24.6919	30		10.5911
DGRP_136	465.323	104.486	27.9701	30		403.426	19.4295	19.3552	30		85.0566
DGRP_138	277.144	89.1854	24.3236	30		339.792	62.1639	15.2476	30		27.0215
DGRP_142	408.308	20.9716	28.0023	30		439.765	29.6134	25.7779	30		-8.64174
DGRP_149	203.718	-108.5	24.4956	30		232.649	-103.087	24.3578	30		-5.41276
DGRP_153	437.411	57.8401	12.4061	30		420.742	24.9757	13.4005	30		32.8644
DGRP_158	255.434	-79.8687	16.6562	35		336.317	-29.2473	13.0605	30		-50.6214
DGRP_161	271.599	-211.766	15.3395	30		480.783	-56.1523	17.4206	29		-155.614
DGRP_176	271.402	-24.5148	26.0569	33		327.116	-37.7608	22.566	30		13.246
DGRP_177	282.307	-155.709	26.4623	29		297.492	-130.127	26.5138	31		-25.582
DGRP_181	407.278	44.9343	24.5678	30		302.387	-89.5107	26.142	38		134.445
DGRP_189	186.89	-89.9685	29.9359	31		317.291	-13.5332	39.0159	30		-76.4353
DGRP_195	438.891	21.6995	14.4796	30		421.524	5.06216	13.7982	30		16.6373
DGRP_208	409.602	-56.39	16.977	30		454.947	-59.9281	19.3732	30		3.53806
DGRP_21	320.08	-37.1914	20.5985	30		432.758	79.4985	16.9885	30		-116.69
DGRP_217	393.295	-27.5304	23.1262	30		384.51	-25.0653	30.6904	30		-2.46509
DGRP_227	462.358	69.3692	19.4616	30		420.256	46.5861	13.2657	30		22.7831
DGRP_228	461.093	14.7469	14.9419	30		450.447	-44.4131	20.3113	30		59.1599
DGRP_229	386.614	-43.489	24.9665	30		503.918	116.156	15.7057	30		-159.645
DGRP_235	440.95	25.0839	28.7458	30		384.365	9.10439	30.8412	30		15.9795
DGRP_237	312.857	-159.475	14.6379	30		304.758	-127.31	17.6054	30		-32.1653
DGRP_239	383.028	40.7734	19.3115	30		400.166	49.5047	14.6649	30		-8.73131
DGRP_26	230.301	-239.003	31.3432	30		292.404	-203.31	18.6136	30		-35.693
DGRP_28	478.381	14.5856	10.7578	30		509.89	26.9033	12.6999	30		-12.3177
DGRP_280	577.198	135.59	24.0498	30		584.381	184.317	22.2468	30		-48.7276
DGRP_301	543.386	152.468	18.0125	30		597.648	184.797	19.8795	30		-32.3285
DGRP_304	126.563	-272.411	19.0492	31		157.731	-252.773	20.9306	30		-19.6384
DGRP_306	317.076	-61.2394	20.1368	30		293.898	-59.2763	15.614	30		-1.96314
DGRP_307	163.481	-255.485	29.434	29		104.268	-346.002	20.3194	28		90.5171
DGRP_309	504.144	89.0973	18.2595	30		302.048	-88.3511	14.2731	30		177.448
DGRP_31	516.024	145.197	25.1347	30		428.638	34.7338	26.0772	30		110.463
DGRP_313	432.199	42.4852	20.8304	30		394.396	-15.9821	20.9395	30		58.4673
DGRP_317	523.708	137.768	17.7937	30		484.678	110.022	18.6756	30		27.7463
DGRP_318	349.661	-36.4753	22.1306	30		370.961	-27.9311	20.6604	31		-8.54412
DGRP_32	476.509	18.9354	25.9168	33		566.407	91.3295	22.6194	30		-72.3941
DGRP_321	531.286	109.843	14.9152	30		544.348	153.883	12.8654	30		-44.0397
DGRP_324	574.162	168.879	22.0361	34		637.861	227.67	19.3056	34		-58.7917
DGRP_332	396.341	9.28994	23.3658	30		390.732	-11.3407	22.781	30		20.6306
DGRP_336	379.075	-33.6645	19.4856	30		380.669	-48.5776	22.3156	30		14.9131
DGRP_338	468.569	132.254	33.8334	30		453.445	95.3941	41.9114	30		36.8597
DGRP_340	529.45	99.1864	23.917	30		532.946	132.472	21.0705	30		-33.2856
DGRP_348	486.292	-2.09129	13.8002	32		398.722	-48.3993	23.7767	33		46.308
DGRP_350	377.164	-13.9334	21.0071	30		397.378	-24.7236	14.4268	30		10.7902
DGRP_352	60.5536	-249.884	12.6022	30		245.212	-106.362	33.9405	30		-143.522
DGRP_356	591.2	219.014	23.5536	30		531.157	189.7	21.2722	30		29.3134
DGRP_357	311.815	-105.948	22.4709	30		351.973	-39.8141	24.3178	30		-66.134
DGRP_358	434.866	34.9504	14.4771	29		412.944	6.357	14.9155	30		28.5934
DGRP_359	376.272	-109.894	25.6717	30		393.487	-100.969	21.4079	30		-8.92469
DGRP_360	370.634	-39.326	19.0422	30		333.759	-102.895	24.6239	30		63.5689
DGRP_361	157.747	-49.4118	28.5029	30		105.678	-85.1937	17.4421	30		35.7819
DGRP_362	410.271	2.41053	29.5337	30		386.124	-38.2385	27.1164	30		40.6491
DGRP_365	336.143	-49.8977	24.6415	31		333.173	-32.5196	26.0613	30		-17.378
DGRP_367	388.912	102.588	27.1726	30		434.991	122.014	28.5602	30		-19.426
DGRP_370	281.229	-150.731	26.6207	30		311.739	-124.708	31.3507	30		-26.0227
DGRP_371	355.065	-111.902	11.5431	30		342.993	-119.692	9.99998	30		7.78922
DGRP_373	154.802	-201.552	26.1451	30		204.127	-101.961	21.7956	30		-99.5919
DGRP_374	520.732	39.4073	29.5675	30		480.947	36.3277	32.1089	30		3.07954
DGRP_375	450.3	50.5826	23.8219	30		374.197	-17.1292	24.7389	30		67.7118
DGRP_377	383.926	65.2606	28.0477	30		345.782	-5.10428	30.5779	30		70.3649
DGRP_379	404.455	23.4906	16.6664	30		409.165	35.777	19.7827	30		-12.2864
DGRP_38	331.788	-75.4963	23.3033	30		343.003	-60.8856	22.3454	30		-14.6107
DGRP_380	418.665	-33.398	23.829	31		373.281	-56.4017	26.0475	30		23.0037
DGRP_381	226.747	-87.167	16.3254	30		232.856	-97.1235	17.4647	30		9.95652
DGRP_382	512.623	67.1669	29.0362	30		509.172	46.3581	31.45	30		20.8088
DGRP_383	525.59	31.5698	24.2559	30		460.009	-35.4638	26.0871	30		67.0335
DGRP_385	512.824	133.691	22.6599	30		333.27	-53.7134	29.4723	27		187.404
DGRP_386	409.268	-26.983	26.3844	30		501.098	30.4925	23.3476	30		-57.4755
DGRP_390	312.912	-55.2941	30.0367	30		307.201	-62.6878	29.6994	30		7.39367
DGRP_391	274.408	-34.4155	29.2585	30		287.426	-41.3659	17.9646	30		6.95041
DGRP_392	467.306	29.6606	20.6264	29		416.806	24.0349	18.1537	30		5.62571
DGRP_395	424.897	62.3593	22.4935	30		250.494	-103.238	22.0287	29		165.597
DGRP_397	279.573	32.7199	22.6315	30		231.677	3.06287	32.1965	29		29.657
DGRP_399	481.159	39.0185	18.7083	30		436.858	27.9439	22.932	30		11.0746
DGRP_40	438.113	105.011	22.2319	30		485.675	109.21	11.8363	30		-4.19947
DGRP_405	429.785	3.67532	19.3076	30		314.188	-74.5223	29.0434	30		78.1976
DGRP_409	285.482	-145.199	26.4757	30		330.661	-55.3608	23.3508	30		-89.8383
DGRP_41	392.501	37.1667	17.9317	30		357.741	-25.5625	14.7621	29		62.7292
DGRP_42	213.341	-219.727	25.7581	30		177.957	-248.484	23.0602	27		28.7573
DGRP_426	522.43	30.0701	25.1877	30		393.276	-54.4063	19.1869	30		84.4764
DGRP_427	357.307	-18.5745	14.9527	30		389.017	14.9878	11.4103	31		-33.5623
DGRP_437	597.864	223.791	11.1847	29		540.311	152.356	13.0469	33		71.435
DGRP_439	607.2	206.712	24.0277	30		613.519	248.915	27.7961	30		-42.2032
DGRP_443	522.659	31.9163	13.6865	30		587.745	107.414	14.0989	30		-75.4981
DGRP_461	279.947	-151.441	23.4517	30		353.717	-77.5319	21.7606	30		-73.9087
DGRP_48	252.936	-59.2176	29.0431	30		308.81	11.7948	21.9003	30		-71.0124
DGRP_486	478.543	70.4237	15.2099	30		456.039	44.3124	15.6066	30		26.1113
DGRP_491	467.733	40.3055	19.0588	30		391.442	-45.6004	20.9763	30		85.9059
DGRP_492	395.788	43.7613	16.8393	30		331.441	-53.9477	24.1748	30		97.709
DGRP_508	383.362	91.0104	25.923	30		409.128	122.492	21.475	30		-31.4812
DGRP_509	339.075	-37.3921	28.4184	30		315.271	-60.2625	22.448	29		22.8704
DGRP_513	346.708	-62.9734	28.1988	30		182.893	-175.504	24.9569	29		112.531
DGRP_517	367.133	-35.4151	25.7922	30		334.635	-58.7774	24.0332	32		23.3623
DGRP_528	433.106	86.2205	17.1816	30		403.7	109.912	23.3463	30		-23.6918
DGRP_530	426.986	66.9143	13.7428	30		410.109	26.3993	27.1592	30		40.5149
DGRP_531	443.103	52.1582	17.4055	30		439.102	40.393	20.478	30		11.7652
DGRP_551	194.354	-142.895	29.3572	29		289.514	-41.7966	22.4129	30		-101.099
DGRP_555	332.253	-73.3392	21.8886	32		356.101	-52.7428	24.6408	30		-20.5964
DGRP_559	264.328	-118.649	28.6319	30		239.227	-148.985	30.018	30		30.3353
DGRP_563	429.164	-26.3325	17.4158	30		399.422	-109.247	19.778	30		82.9146
DGRP_566	487.982	140.392	30.9667	30		550.545	196.797	18.383	30		-56.4046
DGRP_57	364.549	3.13179	25.6541	30		406.74	47.0605	18.4297	30		-43.9287
DGRP_584	526.059	139.863	16.4533	30		542.368	155.091	19.734	30		-15.2285
DGRP_589	386.313	30.4646	24.0052	30		425.669	23.0749	15.5234	30		7.38969
DGRP_59	283.794	-83.9405	18.6748	30		344.977	-52.499	14.3593	30		-31.4415
DGRP_627	473.066	-11.9474	26.7937	30		475.877	56.0874	16.7681	30		-68.0348
DGRP_630	407.568	36.0519	22.9764	30		442.155	65.3884	18.8967	30		-29.3365
DGRP_634	308.033	42.8361	18.8084	30		314.676	70.7855	15.6734	30		-27.9493
DGRP_639	217.15	-87.7267	12.867	30		194.393	-143.504	17.5721	30		55.7769
DGRP_703	248.996	-84.6751	16.6702	30		337.933	11.6172	15.5484	30		-96.2923
DGRP_705	135.109	-244.569	18.7213	28		242.79	-100.514	28.6854	30		-144.055
DGRP_707	349.88	-111.758	28.2494	30		404.754	-83.1257	31.0839	30		-28.6325
DGRP_712	453.151	44.2371	32.2179	30		489.323	99.7872	25.8402	30		-55.5501
DGRP_714	349.022	-25.9815	21.5398	30		301.237	-51.6393	24.2194	28		25.6578
DGRP_716	407.973	-66.208	22.0224	30		451.431	-51.9519	17.2081	30		-14.2561
DGRP_721	402.387	76.8139	20.5354	36		409.135	77.6158	20.7054	36		-0.801893
DGRP_727	189.752	-181.035	15.37	32		230.046	-155.349	22.9089	31		-25.6855
DGRP_73	373.1	-15.8054	25.5474	30		404.016	4.88367	28.2973	30		-20.6891
DGRP_730	371.019	-20.754	26.9093	30		429.089	46.445	20.5032	30		-67.1991
DGRP_732	453.616	41.0559	32.3825	29		543.448	129.181	12.3009	30		-88.1252
DGRP_737	588.252	104.273	26.1246	30		538.96	37.3715	29.8008	30		66.9013
DGRP_738	522.654	110.345	18.3227	30		501.873	57.4729	12.2202	30		52.8725
DGRP_748	519.983	7.61312	16.9737	30		444.378	-84.1839	27.4991	35		91.797
DGRP_75	425.254	35.9158	21.9655	30		396.419	6.56174	12.6455	30		29.354
DGRP_757	203.569	-97.5988	20.9717	30		307.056	12.8013	18.0457	30		-110.4
DGRP_761	532.978	141.617	14.7884	30		431.092	44.1295	25.8633	30		97.4872
DGRP_765	465.321	82.4648	22.1164	30		478.699	89.8835	15.3814	30		-7.41867
DGRP_774	575.284	134.194	19.0242	30		557.021	130.644	14.5252	30		3.54981
DGRP_776	218.004	10.1326	16.2369	30		269.06	-10.968	20.2428	30		21.1007
DGRP_783	406.872	38.1677	14.7092	30		425.826	7.73032	16.2652	30		30.4374
DGRP_786	259.624	-4.9777	35.4959	30		259.771	-32.6108	32.4202	30		27.6331
DGRP_796	513.695	96.419	24.1663	30		618.113	187.146	14.2203	30		-90.7266
DGRP_799	280.137	-95.2766	20.5712	18		383.554	2.56548	26.0799	24		-97.8421
DGRP_801	490.668	35.0726	24.8258	30		522.222	23.2366	27.5118	30		11.836
DGRP_802	551.155	129.183	24.849	30		550.164	147.451	21.9255	30		-18.2681
DGRP_805	366.163	-16.8898	23.4507	30		350.767	-31.124	25.6068	30		14.2342
DGRP_808	418.499	-37.7431	21.5922	36		394.772	-79.1002	19.5587	28		41.3571
DGRP_810	526.659	167.795	13.0249	30		500.461	114.376	12.0141	30		53.4187
DGRP_812	448	57.5755	33.0817	30		543.234	150.313	31.3786	30		-92.7378
DGRP_818	435.001	64.9112	16.4883	30		411.331	15.7623	17.2272	30		49.1489
DGRP_819	400.134	-43.0319	28.6716	24		490.975	59.3039	19.9301	30		-102.336
DGRP_820	328.762	-38.8705	25.6406	30		393.808	29.476	21.9827	30		-68.3465
DGRP_821	271.958	-111.216	19.816	30		265.011	-125.195	18.5466	30		13.9785
DGRP_822	499.63	77.5276	22.0354	30		544.389	89.3211	20.8246	30		-11.7935
DGRP_83	355.707	-28.934	18.7039	30		359.227	-40.433	19.0384	30		11.499
DGRP_832	439.055	74.4651	15.8816	30		421.661	50.8781	21.4832	31		23.587
DGRP_837	404.871	42.9092	25.3559	30		469.256	63.0753	23.4991	30		-20.1661
DGRP_843	232.512	-110.449	25.3361	29		277.505	-92.5932	24.0141	30		-17.856
DGRP_849	365.751	-28.7464	18.8339	30		307.372	-96.4404	20.0284	30		67.694
DGRP_850	556.565	143.402	16.9685	30		511.137	97.7078	21.0157	30		45.6937
DGRP_852	548.774	138.644	17.4317	29		540.925	155.174	14.8697	30		-16.5302
DGRP_853	539.927	170.457	25.3484	30		511.07	137.023	26.2362	30		33.4342
DGRP_855	276.297	-33.6429	18.3609	30		323.623	22.9302	22.954	30		-56.5731
DGRP_857	449.589	84.4932	17.5349	30		454.715	75.5669	29.6229	31		8.92628
DGRP_859	511.585	125.771	24.7629	32		535.259	135.443	22.9926	30		-9.67109
DGRP_861	160.738	-209.598	16.0221	30		144.472	-220.456	15.1186	31		10.8581
DGRP_879	339.609	-110.932	17.4468	30		311.18	-112.288	21.4497	30		1.35562
DGRP_88	521.266	117.674	31.0651	30		535.336	106.081	26.6995	30		11.5924
DGRP_882	443.48	14.5635	17.6213	30		431.735	21.3628	18.7504	30		-6.79934
DGRP_884	333.205	116.237	30.6358	30		269.456	80.7568	27.6984	30		35.4804
DGRP_887	265.722	-122.859	21.9288	30		310.884	-85.1888	23.4868	30		-37.67
DGRP_890	408.802	-24.4304	18.6385	30		435.421	51.4221	11.4019	30		-75.8526
DGRP_892	341.48	1.80147	17.9621	30		275.902	-70.6632	12.7209	30		72.4647
DGRP_897	501.39	152.125	16.4553	36		517.963	151.882	21.0348	30		0.243851
DGRP_900	192.433	-178.036	16.4497	30		254.508	-112.728	29.0731	30		-65.3081
DGRP_907	450.537	15.7058	23.0029	30		424.688	7.76011	23.553	30		7.94568
DGRP_91	222.194	-146.615	13.9778	30		259.162	-149.024	24.7298	30		2.40931
DGRP_913	445.493	-0.170489	15.7045	30		458.994	60.8394	16.3765	30		-61.0099
DGRP_93	535.338	67.8769	18.5785	30		559.8	53.8661	16.0595	30		14.0107
